# Supplementary material for: Near-infrared STED nanoscopy with an engineered bacterial phytochrome
Source: PubMed Central journal article supplement (PMC6232180; doi:10.1038/s41467-018-07246-2), 2018-11-12
Supplement: 41467_2018_7246_MOESM1_ESM.pdf [file 41467_2018_7246_MOESM1_ESM.pdf]

**Supplemental figures and tables to**

M. Kamper et al., Near-infrared STED nanoscopy with an engineered bacterial phytochrome

Dr PAS-GAF-PHY MSRDPLPFFPPLYLGGPEITTENCEREPIHIPGSIQPHGALLTADGHSGEVLQMSL  
W1 MSRDPLPFFPPLYLGGPEITTENCEREPIHIPGSIQPHGALLTADGHSGEVLQMSL  
W2 MSRDPLPFFPPLYLGGPEITTENCEREPIHIPGSIQPHGALLTADGHSGEVLQMSL  
W3 MSRDPLPFFPPLYLGGPEITTENCEREPIHIPGSIQPHGALLTADGHSGEVLQMSL  
W4 MSRDPLPFFPPLYLGGPEITTENCEREPIHIPGSIQPHGALLTADGHSGEVLQMSL

Dr PAS-GAF-PHY NAATFLGQEPTVLRGQTLAALLPEQWPALQAALPPGCPDALQYRATLDWPAAGHLS  
W1 NAATFLGQEPTVLRGQTLAALLPEQWPALQAALPPGCPDALQYRATLDWPAAGHLS  
W2 NAATFLGQEPTVLRGQTLAALLPEQWPALQAALPPGCPDALQYRATLDWPAAGHLS  
W3 NAATFLGQEPTVLRGQTLAALLPEQWPALQAALPPGCPDALQYRATLDWPAAGHLS  
W4 NAATFLGQEPTVLRGQTLAALLPEQWPALQAALPPGCPDALQYRATLDWPAAGHLS

145

Dr PAS-GAF-PHY LTVHRVGEILLILEFEPTTEAWDSTGPHALRNAMFALESAPNLRALAEVATQTVRELTG  
W1 LTVHRVGEILLILEFEPTTEAWDSTGPHALRNAMSALESAPNLRALAEVATQTVRELTG  
W2 LTVHRVGEILLILEFEPTTEAWDSTGPHALRNAMSALESAPNLRALAEVATQTVRELTG  
W3 LTVHRVGEILLILEFEPTTEAWDSTGPHALRNAMSALESAPNLRALAEVATQTVRELTG  
W4 LTVHRVGEILLILEFEPTTEAWDSTGPHALRNAMSALESAPNLRALAEVATQTVRELTG

Dr PAS-GAF-PHY FDRVMLYKFAPDATGEVIAEARREGLHAFGLGHRFPASDIPAQARALYTRHLLRLTAD  
W1 FDRVMLYKFAPDATGEVIAEARREGLHAFGLGHRFPASDIPAQARALYTRHLLRLTAD  
W2 FDRVMLYKFAPDATGEVIAEARREGLHAFGLGHRFPASDIPAQARALYTRHLLRLTAD  
W3 FDRVMLYKFAPDATGEVIAEARREGLHAFGLGHRFPASDIPAQARALYTRHLLRLTAD  
W4 FDRVMLYKFAPDATGEVIAEARREGLHAFGLGHRFPASDIPAQARALYTRHLLRLTAD

Dr PAS-GAF-PHY TRAAAVPLDPVLNPQTNAPTPLGGAVLRATSPMHMQYLRNMGVGSLSVSVVVGG  
W1 TRAAAVPLDPVLNPQTNAPTPLGGAVLRATSPMHMQYLRNMGVGSLSVSVVVGG  
W2 TRAAAVPLDPVLNPQTNAPTPLGGAVLRATSPMHMQYLRNMGVGSLSVSVVVGG  
W3 TRAAAVPLDPVLNPQTNAPTPLGGAVLRATSPMHMQYLRNMGVGSLSVSVVVGG  
W4 TRAAAVPLDPVLNPQTNAPTPLGGAVLRATSPMHMQYLRNMGVGSLSVSVVVGG

311 314

Dr PAS-GAF-PHY QLWGLIACHHQTPYVLPDLRRTTLEYLGRLELSQVQVKEAADVAAFRQSLREHHR  
W1 QLWGLIACHHQTPYVLPDLRRTTLEYLGRLELSQVQVKEAADVAAFRQSLREHHR  
W2 QLWGLIACHHQTPYVLPDLRRTTLEYLGRLELSQVQVKEAADVAAFRQSLREHHR  
W3 QLWGLIACHHQTPYVLPDLRRTTLEYLGRLELSQVQVKEAADVAAFRQS  
W4 QLWGLIACHHQTPYVLPDLRRTTLEYLGRLELSQVQVKE

Dr PAS-GAF-PHY VALAAAHSLSPHDTLSDPALDLLGLMRAGGLILRFEGRWQTLGEVPPAPAVDALLAW  
W1 VALAAAHSLSPHDTLSDPALDLLGLMRAGGLILRFEGRWQTLGEVPPAPAVDALLAW  
W2 VALAAAHSLSPHDTLSDPALDLLGLMRAGGLILRFEGRWQTLGEVPPAPAVDALLAW  
W3  
W4

Dr PAS-GAF-PHY LETQPGALVQTDALGQLWPAGADLAPSAAGLLAISVGEWSECLVWLRPELELRLE  
W1 LETQPGALVQTDALGQLWPAGADLAPSAAGLLAISVGEWSECLVWLRPELELRLE  
W2 LETQPGALVQTDALGQLWPAGADLAPSAAGLLAISVGEWSECLVWLRPELELRLE  
W3  
W4

Dr PAS-GAF-PHY VAWGGATPDQAKDDLGP RHSFDTYLEEKRGYAEPWHPGEIEEAQDLRDTLTGALG  
W1 VAWGGATPDQAKDDLGP RHSFDTYLEEKRGYAEPWHPGEIEEAQDLRDTLTGALG  
W2  
W3  
W4

Dr PAS-GAF-PHY E  
W1 ERLSVIRDNLNRALTQSNAEWRQYGFV  
W2 ERLSVIR  
W3  
W4

**Supplementary Figure 1** Sequence alignment against DrPAS-GAF-PHY (DR\_A0050). Yellow: PAS-domain, green: GAF-domain, turquoise: PHY-domain. Red frames highlight monomerization mutations<sup>2</sup> (F145S, L311E, L314E).



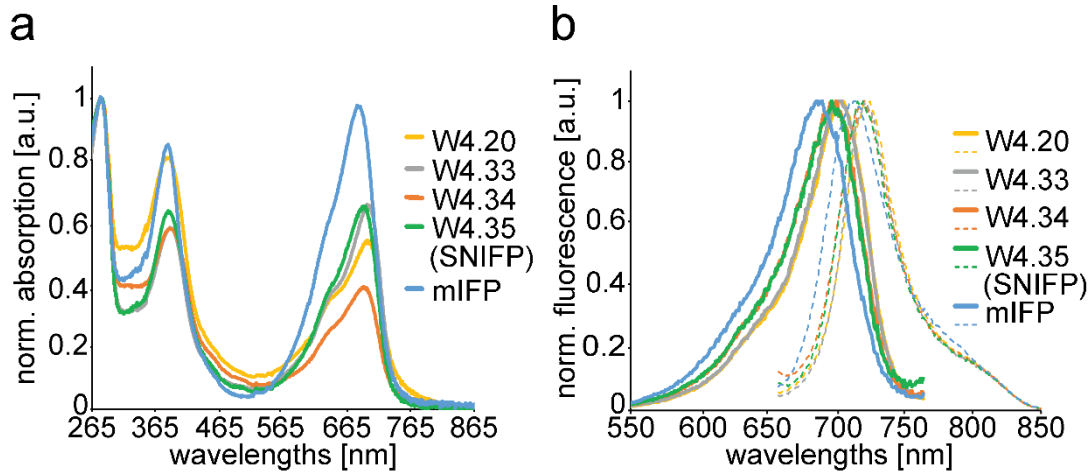

**Supplementary Figure 2** Spectra **(a)** Absorption spectra. **(b)** Fluorescence excitation (solid lines) and emission (dotted lines) spectra. All spectra were determined on purified proteins in 100 mM Tris-HCl, 150 mM NaCl, pH 7.5.

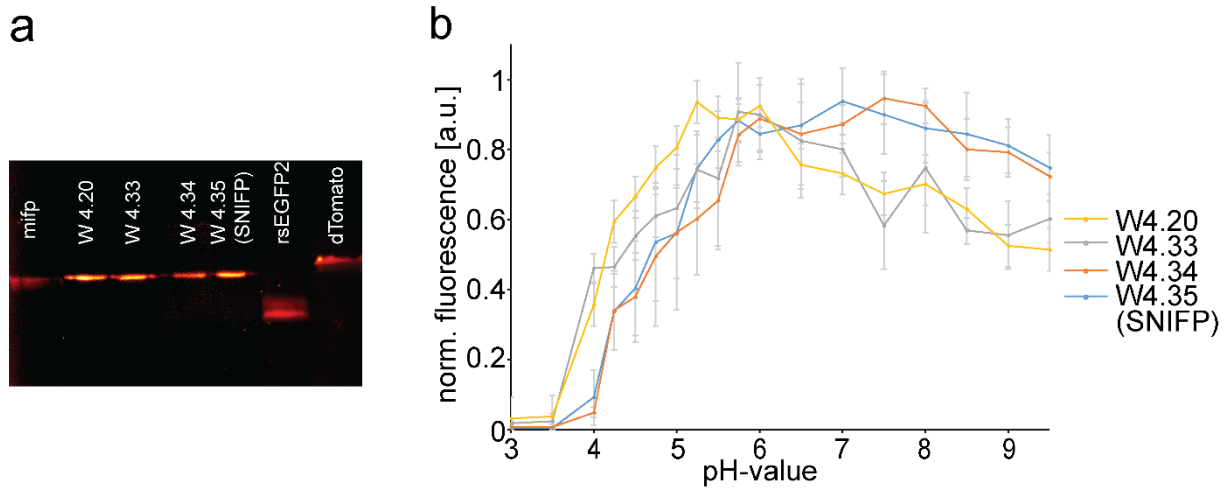

**Supplementary Figure 3** Oligomerization tendency and pH-stability. **(a)** Semi-native 15 % polyacrylamide gel (containing 0.1 % sodiumdodecyl sulfate) electrophoresis. As size standards we utilized the monomeric bacteriophytochrome mIFP<sup>1</sup> (~35 kDa), the monomeric fluorescent protein rsEGFP2<sup>3</sup> (~29 kDa) and the dimeric fluorescent protein dTomato<sup>4</sup> (~58 kDa). **(b)** Determination of pH-stability. The fluorescence signal was determined on purified proteins at different pH values, as indicated. Fluorescence values were normalized to the maximum. All measurements were performed in replicates (n=11 for W4.34 and W4.35; n=6 for W4.20 and W4.33). Error bars: standard deviation.

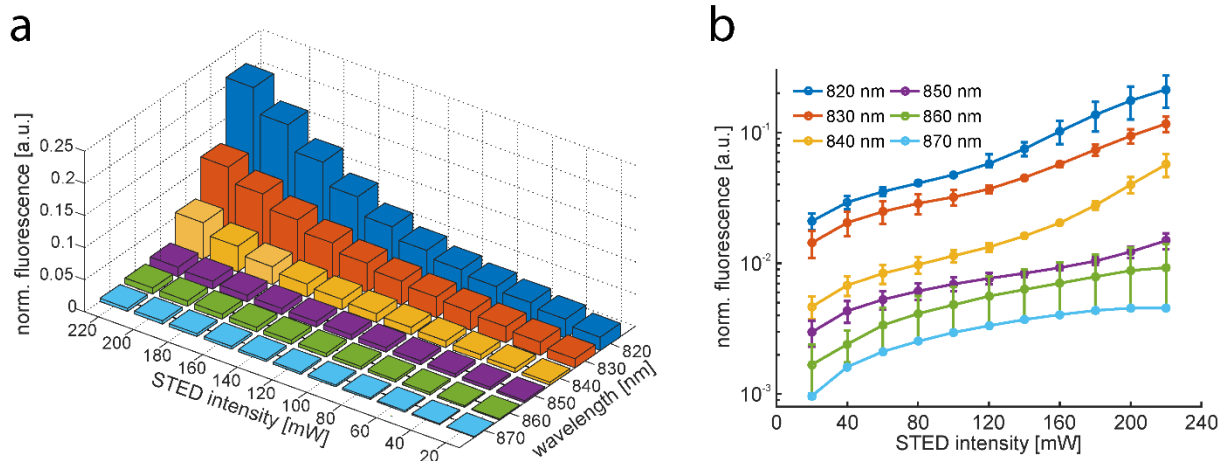

**Supplementary Figure 4** Anti-Stokes fluorescence excitation of SNIFP by the STED light. The anti-Stokes fluorescence excitation of SNIFP was measured on living Hela cells expressing VIM-SNIFP. 25  $\mu$ M biliverdin was added to the medium ~two hours before imaging. We varied both the wavelength of the excitation beam (from 820 nm to 870 nm; 60 ps pulses) and the laser intensity (20 mW to 230 mW, measured at the back aperture of the objective lens). Fluorescence intensities were measured on filaments; the fluorescence signal induced by the STED beam was normalized to the fluorescence signal induced by irradiation with light of 676 nm alone (5  $\mu$ W at the back aperture of the objective lens). All measurements were performed in three independent replicates. **(a)** Linear and **(b)** logarithmic representation of the normalized fluorescence intensities. Error bars: standard deviation.

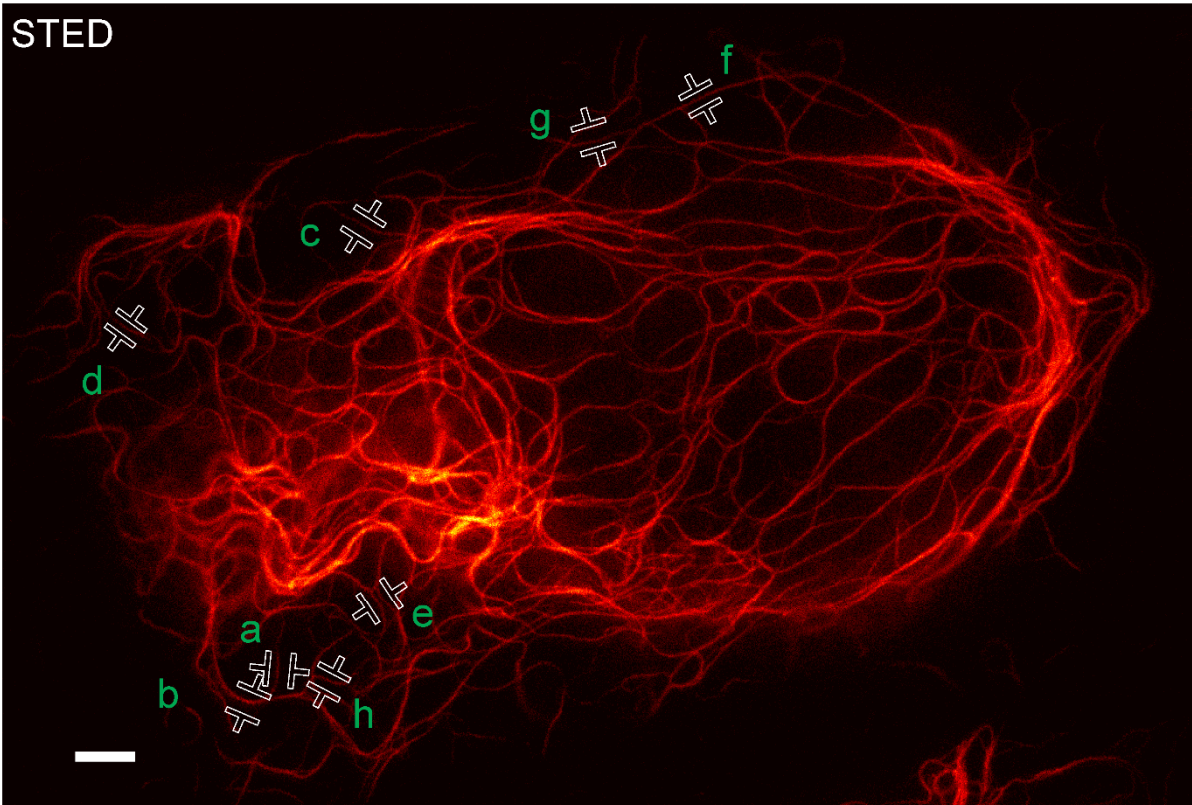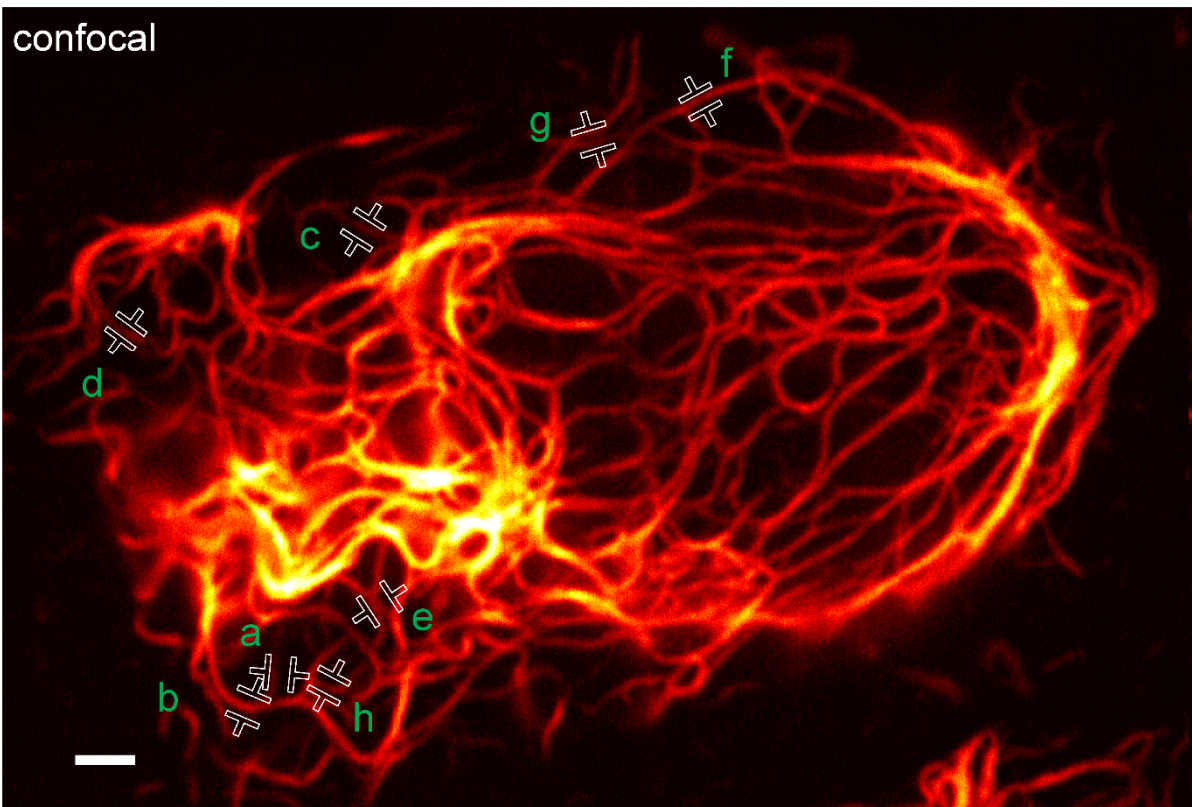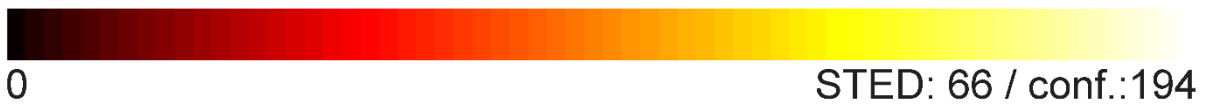

**Supplementary Figure 5** NIR STED nanoscopy of living HeLa cell expressing VIM-SNIFP. Shown is the same cell as in the inset of Fig. 2a. Confocal image (bottom) and corresponding STED image (top). The letters in the images (a-h) indicate the sites used to measure fluorescence intensity line profiles (see Supplementary Fig. 6). Scale bars: 2  $\mu\text{m}$ .

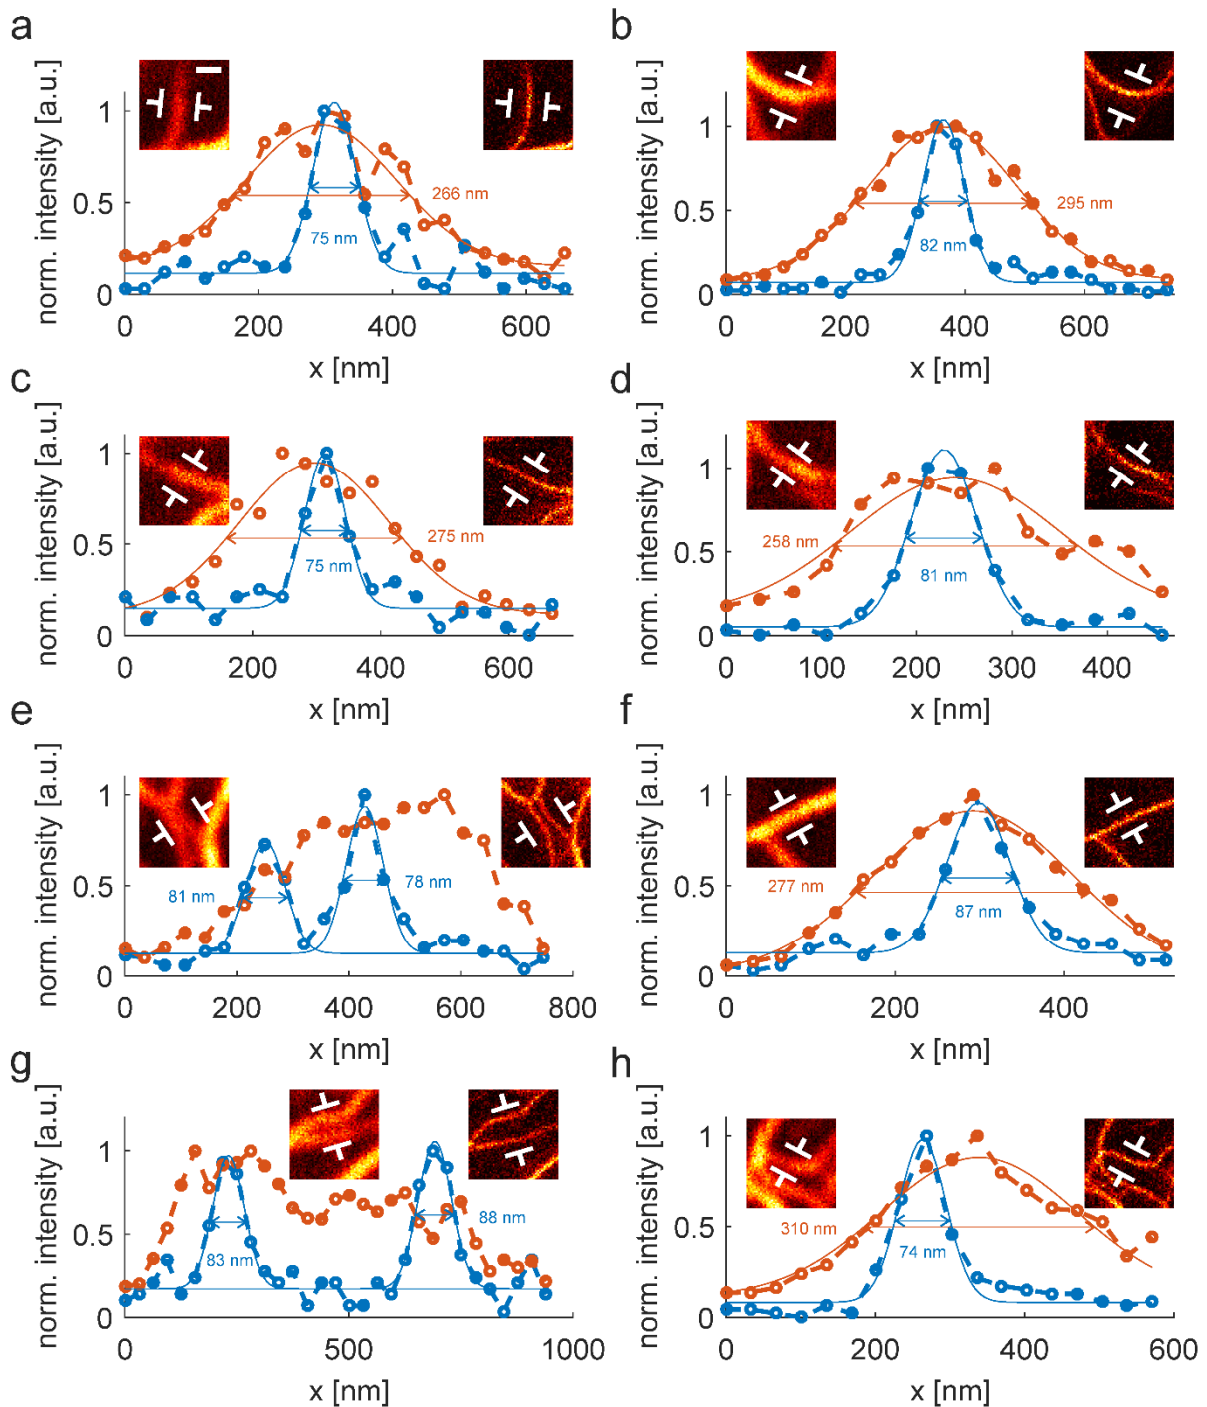

**Supplementary Figure 6** Fluorescence intensity line profiles on Vimentin filaments. Averaged line profiles were taken at the positions (a-h) indicated in Supplementary Figure 5. The line width for averaging was 90 nm (3 pixels). Solid line: The measured data were fitted with a Gaussian function. Confocal profiles are not fitted in e and g because the short distance between the two filaments made the fitting unreliable. Blue circles: STED data; orange circles: confocal data. The FWHM values were determined on the fitted function and indicated on the plots. Insets show the 1.8  $\mu\text{m}$  x 1.8  $\mu\text{m}$  regions where the line profiles were taken. The FWHM in the STED images is  $80.5 \pm 4.9$  nm ( $n=10$ ) and in the confocal recordings  $274 \pm 20$  nm ( $n=8$ ). Scale bars: 400 nm.



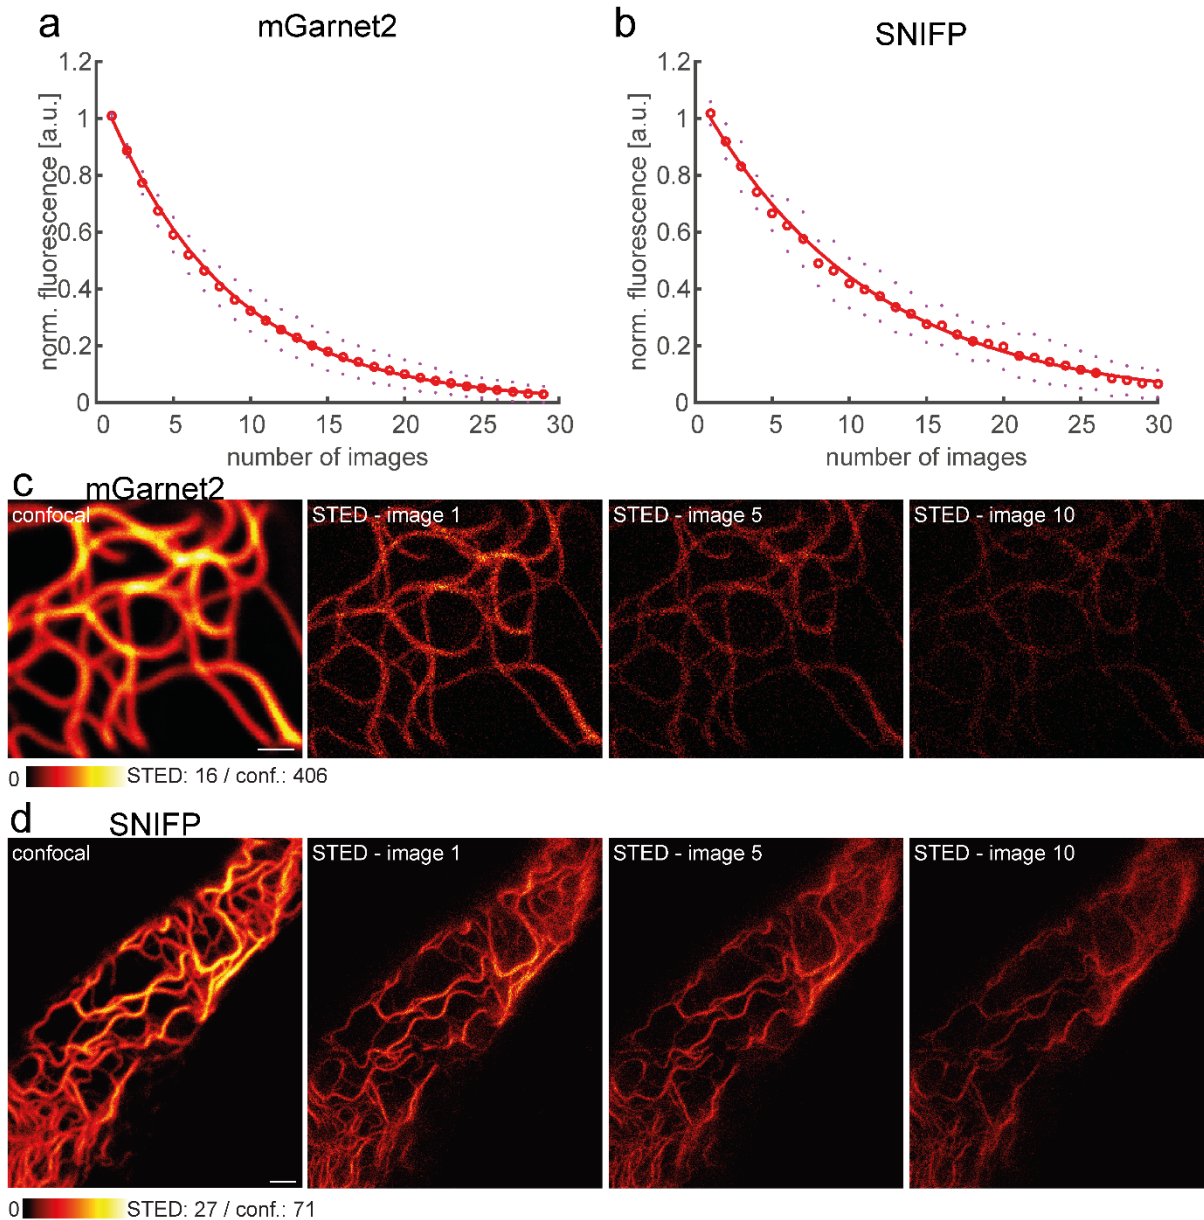

**Supplementary Figure 7** Photostability of mGarnet2 and SNIFP during STED imaging. We recorded 30 consecutive STED images at the same site in living HeLa cells expressing VIM-mGarnet2 (a and c) or VIM-SNIFP (b and d). a and b, the red lines show a single exponential fit to the data (red circles) with small dots to indicate the standard deviation. The characteristic decay times (decay to  $1/e$  of the initial signal) were  $8 \pm 2$  (n=9) for mGarnet2 and  $11 \pm 3$  (n=8) for SNIFP. Imaging conditions were chosen to achieve comparable resolution. Note that SNIFP is a NIR FP, whereas mGarnet2 is a far-red FP, so that different wavelengths and imaging parameters are required for the STED recordings. c (mGarnet2) and d (SNIFP) show a confocal recording and STED images 1, 5 and 10, as indicated. In case of d, 25  $\mu$ M biliverdin was added to the medium ~two hours before imaging. Scale bars c: 1  $\mu$ m, d: 2  $\mu$ m.

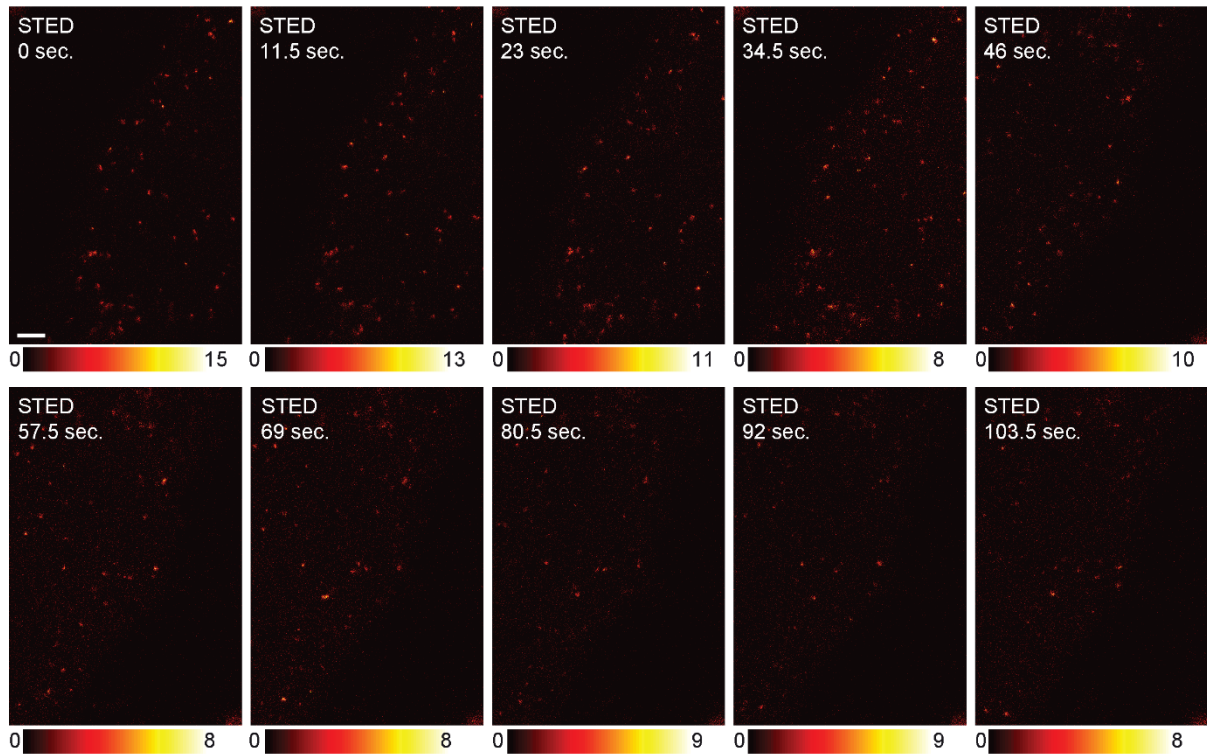

**Supplementary Figure 8** Live-cell STED nanoscopy with SNIFP targeted to the peroxisomes. Ten consecutive STED images recorded at the same site of a living HeLa cell expressing SNIFP-PTS to label the peroxisomes. Recordings were started at the indicated time points. Recording of one image took 6.5 s. 25  $\mu$ M biliverdin was added to the medium ~two hours before imaging. Imaging parameters are listed in Supplementary Table 3. Scale bar: 2  $\mu$ m.



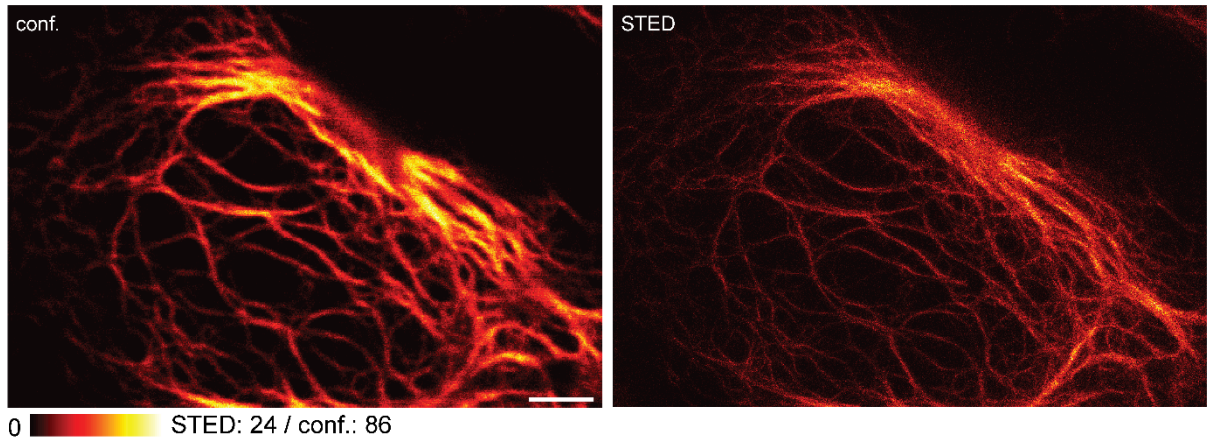

**Supplementary Figure 9** STED imaging of SNIFP without biliverdin. Confocal (left) and STED (right) imaging of a living HeLa cell expressing VIM-SNIFP without addition of biliverdin. Scale bar: 2  $\mu\text{m}$ .

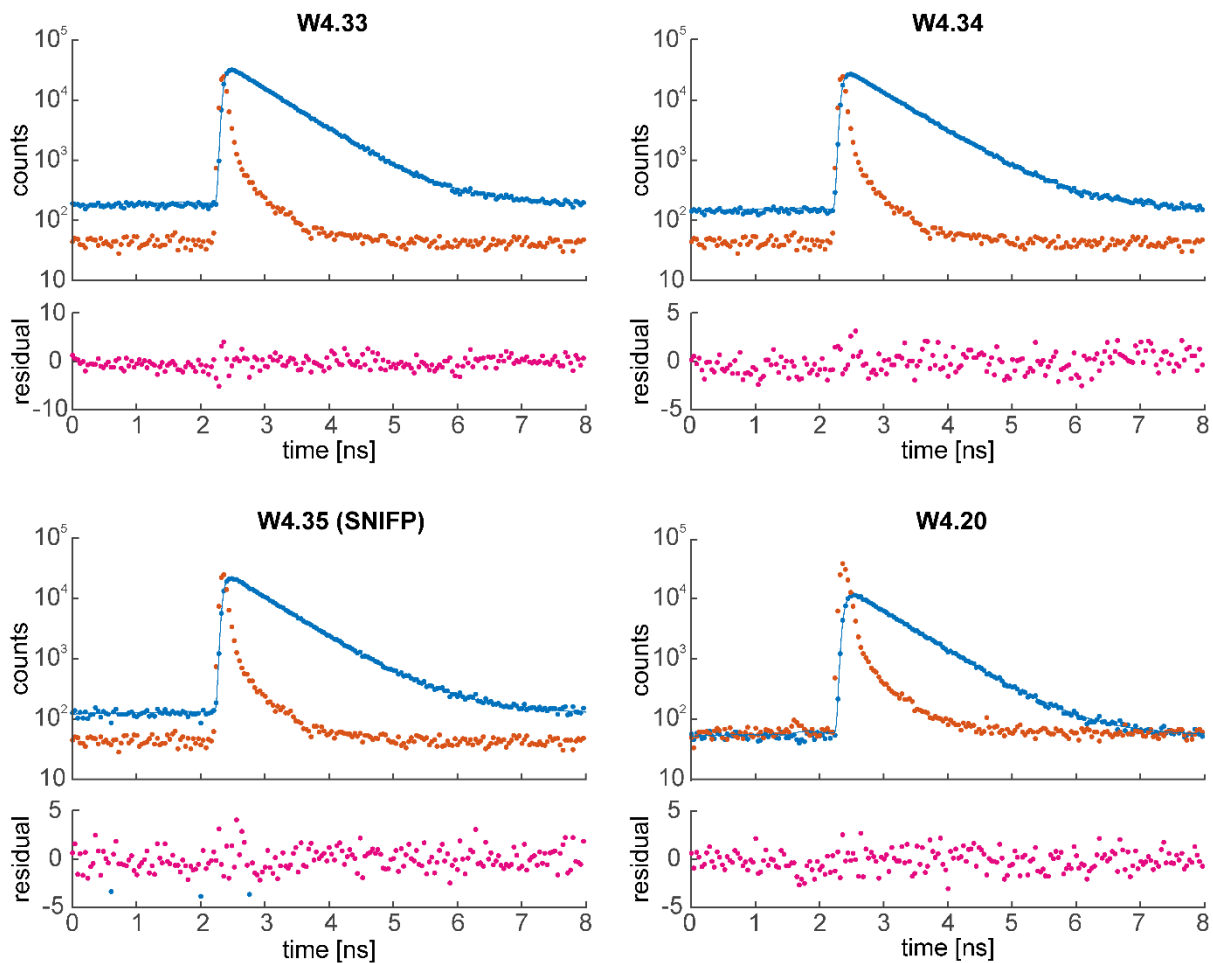

**Supplementary Figure 10** Determination of fluorescence lifetimes. The respective bacteriophytochrome variants were fused to vimentin and expressed in HeLa cells. The fluorescence lifetimes were determined in living cells at room temperature. 25  $\mu$ M biliverdin was added to the medium ~two hours before imaging. The fluorescence signal was collected while scanning across Vimentin filaments. Red dots: Measured instrument response function. Blue dots: Measured decay curves. For better visualization, only every 10th data point is plotted. Solid blue line: Multi-exponential decay fit. Magenta dots: Residuals of the fit from the measured data.

| template variant | domains (aa)         | cellular brightness in <i>E. coli</i> cells [% W1] |
|------------------|----------------------|----------------------------------------------------|
| W1               | PAS-GAF-PHY (530 aa) | 100                                                |
| W2               | PAS-GAF-PHY (511 aa) | 73 ± 1                                             |
| W3               | PAS-GAF (331 aa)     | 254 ± 4                                            |
| W4               | PAS-GAF (321 aa)     | 359 ± 37                                           |

**Supplementary Table 1** Normalized cellular brightness of bacteriophytochrome variants expressed in *E. coli* cells. Protein expression was induced approximately six hours before measurement. Cells were excited with 671 nm and fluorescence was detected at 690 - 766 nm. Measurements were performed using a FACS instrument. Two independent sets of experiments were performed. Error: Standard deviation.

| W4 variant    | mutations in W4         | eXC <sub>max</sub> [nm] | eM <sub>max</sub> [nm] | φ [%] direct measurement | ε [M <sup>-1</sup> cm <sup>-1</sup> ] | cellular brightness in <i>E. coli</i> cells [% W4.20] | cellular brightness in mammalian cells [% W4.20] | lifetime τ [ps] | fluorescence at pH 9 [% of max.] |
|---------------|-------------------------|-------------------------|------------------------|--------------------------|---------------------------------------|-------------------------------------------------------|--------------------------------------------------|-----------------|----------------------------------|
| mIFP*         | -                       | 683                     | 704                    | -                        | 55000                                 | -                                                     | -                                                | -               | -                                |
| W4.20         | Y263F                   | 705                     | 723                    | 2.0 ± 0.3                | 47400 ± 1100                          | 100                                                   | 100                                              | 613 ± 7         | 52 ± 8                           |
| W4.33         | Y263F<br>G270R          | 704                     | 720                    | 2.4 ± 0.5                | 59000 ± 9200                          | 119 ± 10                                              | 133 ± 5                                          | 597 ± 4         | 56 ± 10                          |
| W4.34         | Y263F<br>D207L          | 700                     | 721                    | 2.6 ± 0.6                | 83900 ± 18000                         | 170 ± 13                                              | 228 ± 14                                         | 627 ± 9         | 80 ± 7                           |
| W4.35 (SNIFP) | Y263F<br>D207L<br>G270R | 697                     | 720                    | 2.2 ± 0.3                | 149200 ± 19200                        | 174 ± 15                                              | 247 ± 14                                         | 631 ± 11        | 81 ± 8                           |

**Supplementary Table 2** Properties of NIR FPs generated in this study. All measurements were performed in replicates. Errors: Standard deviations. All data belonging to mIFP were taken from<sup>1</sup>.

| experiment                                                  | figure                       | excitation power [ $\mu$ W] | STED power [mW] | STED pulse length | pixel size [nm] | pixel dwell time [ $\mu$ s] | additional information |             |
|-------------------------------------------------------------|------------------------------|-----------------------------|-----------------|-------------------|-----------------|-----------------------------|------------------------|-------------|
| Confocal time lapse and photostability measurements         | Fig. 1 j, k                  | 3 or 6                      | NA              | NA                | 60x60           | 6                           |                        |             |
| STED imaging VIM-SNIFP                                      | Fig. 2a + Suppl. Fig. 5      | 5                           | ~220 (860 nm)   | ~60 ps            | 30x30           | 50                          | time gating            |             |
| STED imaging SNIFP-NUP50                                    | Fig. 2c                      | 6                           | ~150 (860 nm)   | ~120 ps           | 30x30           | 80                          |                        |             |
| 2 color STED/confocal imaging                               | VIM<br>ER                    | Fig. 2d                     | 6               | ~190 (860 nm)     | ~60 ps          | 30x30                       | 60                     | time gating |
|                                                             |                              |                             | 6               | NA                | NA              | 30x30                       | 60                     |             |
| STED imaging of VIM-SNIFP without BV addition               | Suppl. Fig. 9                | 5                           | ~220 (860 nm)   | ~60 ps            | 30x30           | 20                          |                        |             |
| STED time lapse and photostability mGarnet 2 (VIM-mGarnet2) | Suppl. Fig. 7a, c            | 13 (640 nm)                 | 53 (775 nm)     | 1.3 ns            | 30x30           | 30                          | time gating            |             |
| STED time lapse and photostability SNIFP (VIM-SNIFP)        | Fig. 2e<br>Suppl. Fig. 7b, d | 5                           | ~220 (860 nm)   | 60 ps             | 30x30           | 10                          |                        |             |
| STED time lapse of SNIFP-PTS                                | Fig. 2 f<br>+Suppl. Fig. 8   | 5                           | ~220 (860 nm)   | 60 ps             | 30 x 30         | 8                           |                        |             |
| STED wavelength scan                                        | Suppl. Fig. 4                | 5                           | 20-230 (scan)   | ~60 ps            | 25x25           | 4                           |                        |             |
| lifetime measurement                                        | Suppl. Fig. 10               | 5                           | NA              | NA                | 100x100         | 3                           |                        |             |

**Supplementary Table 3** Imaging parameters.

## References

- 1 Yu, D. *et al.* A naturally monomeric infrared fluorescent protein for protein labeling in vivo. *Nat Meth* **12**, 763-U106, doi:10.1038/nmeth.3447 (2015).
- 2 Auldridge, M. E., Satyshur, K. A., Anstrom, D. M. & Forest, K. T. Structure-guided engineering enhances a phytochrome-based infrared fluorescent protein. *J Biol Chem* **287**, 7000-7009, doi:10.1074/jbc.M111.295121 (2012).
- 3 Grotjohann, T. *et al.* rsEGFP2 enables fast RESOLFT nanoscopy of living cells. *eLife* **1:e00248** doi:10.7554/eLife.00248 (2012).
- 4 Shaner, N. C. *et al.* Improved monomeric red, orange and yellow fluorescent proteins derived from *Discosoma* sp. red fluorescent protein. *Nat Biotechnol* **22**, 1567-1572 (2004).
